# Supplementary material for: Simultaneous blockade of IL-6 and CCL5 signaling for synergistic inhibition of triple-negative breast cancer growth and metastasis
Source: Springer Nature journal article supplement (doi:10.1186/s13058-018-0981-3), 2018-06-14
Supplement: MOESM1 [file 15846084]

# Figure S1

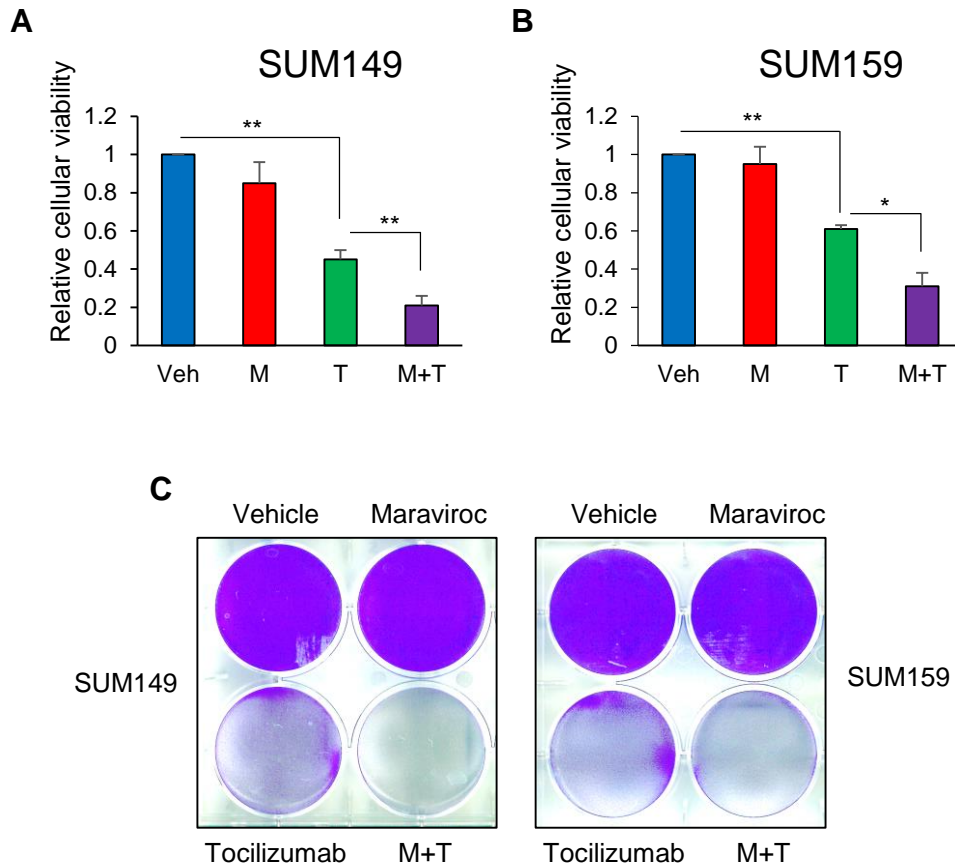

**Figure S1:** Cellular viability assays of co-cultured **a** SUM149 and **b** SUM159 cells on the bottom chambers with LECs on the top chamber in treatment of various concentration of maraviroc and **d** tocilizumab (Transwell plates). The cellular viability was measured for 72 h by MTT assay (\* $P < 0.001$ ,  $n = 3$ ). **c** Crystal violet staining assay was performed in treatment of maraviroc (2  $\mu\text{M}$ ), tocilizumab (200  $\mu\text{g/ml}$ ), and the combination of maraviroc and tocilizumab.

## Figure S2

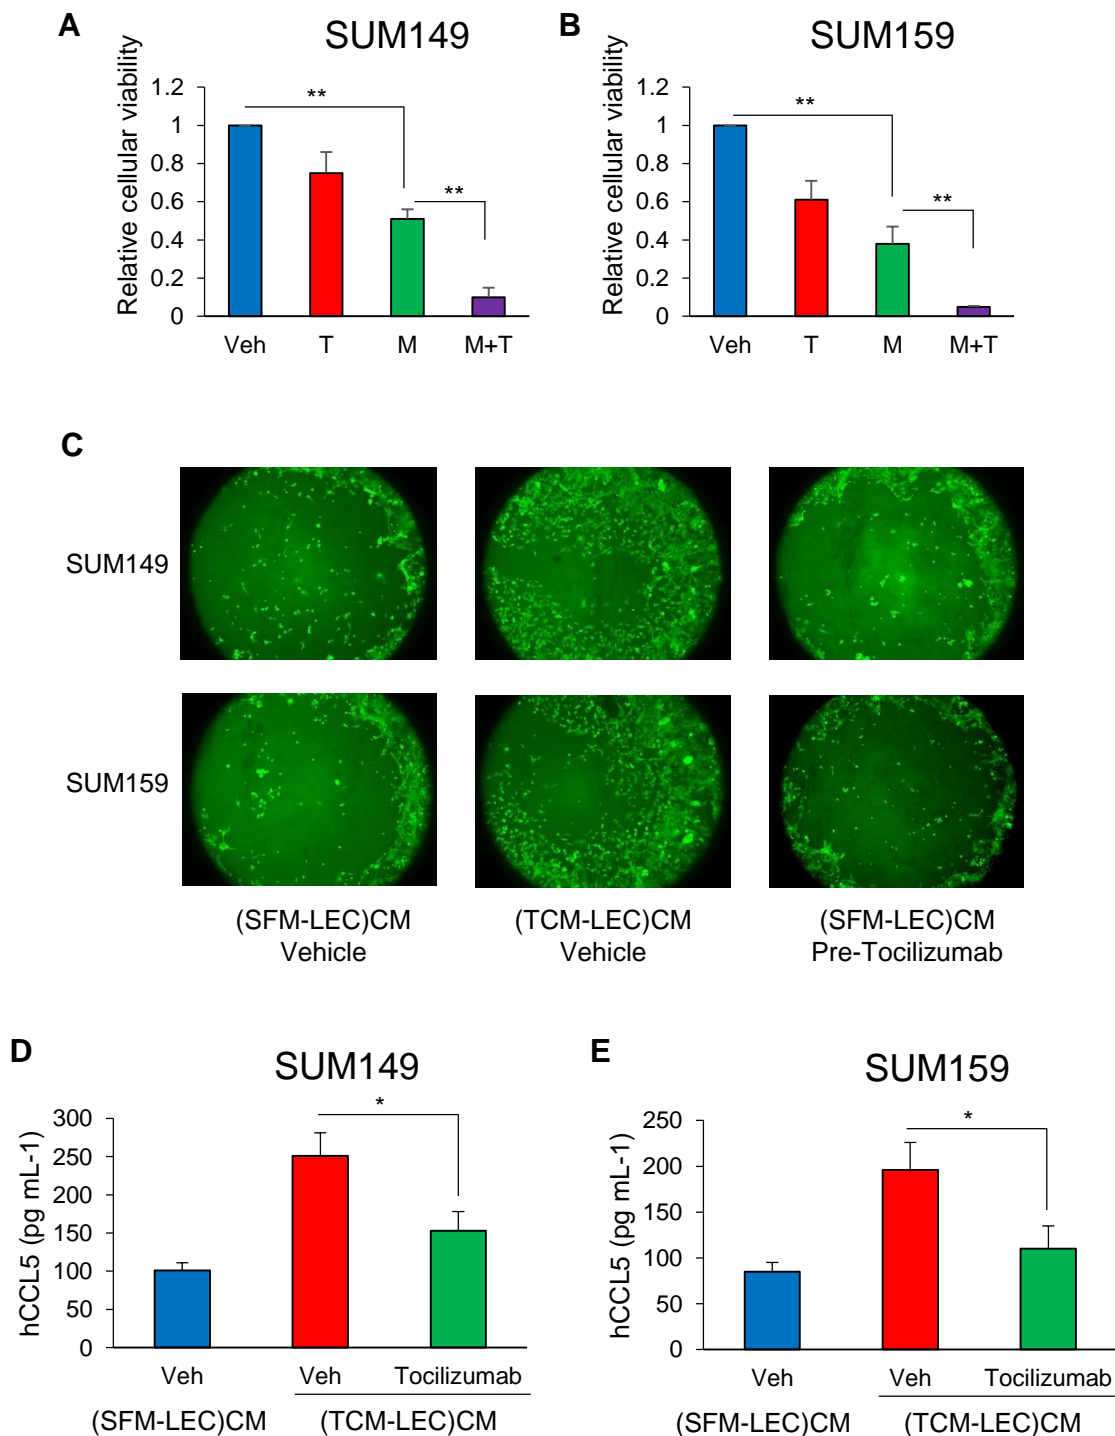

**Figure S2:** Migration assay of **a** SUM149 and **b** SUM159 cells (top chamber) in CM (bottom chamber) from LECs co-cultured with two TNBC cells with treatment of maraviroc, tocilizumab, and the combination. The migrated cells were counted for 24 h by the crystal violet staining. The representative migration was shown. (\*\* $P < 0.001$ ,  $n = 3$ ). **c** Migration assay of TNBC cells in CM from LECs co-cultured with TNBC cells with tocilizumab pre-treatment. The pre-labeled with Cell Tracker Green and the migration was measured using the Oris cell migration kit. ELISA of human CCL5 (Quantikine ELISA, R&D System) in the CM of LECs co-cultured with **d** SUM149 and **e** SUM159 cells pre-treated tocilizumab. (\* $P < 0.001$ ,  $n = 3$ ).
